# Supplementary material for: Extending the application range of Hg isotopic analysis to sub-μg L−1 levels using cold vapor generation multi-collector inductively coupled plasma-mass spectrometry with 1013 ohm Faraday cup amplifiers
Source: Royal Society of Chemistry journal article supplement (doi:10.1039/d3ja00414g), 2024-01-01
Supplement: d3ja00414g1.pdf [file d3ja00414g1.pdf]

## **ELECTRONIC SUPPLEMENTARY INFORMATION**

**Extending the application range of Hg isotopic analysis to sub- $\mu\text{g/L}$  levels using cold vapor generation multi-collector inductively coupled plasma-mass spectrometry with  $10^{13}$  Ohm Faraday cup amplifiers.**

Laura Suárez-Criado<sup>1</sup>, Eduardo Bolea-Fernandez<sup>2,3</sup>, Lana Abou-Zeid<sup>2</sup>, Mathias Vandermeiren<sup>2</sup>, Pablo Rodríguez-González<sup>1</sup>, J. Ignacio García Alonso<sup>1</sup> and Frank Vanhaecke<sup>2</sup>

<sup>1</sup>*Department of Physical and Analytical Chemistry, University of Oviedo, Julián Clavería, 8, 33006-Oviedo, Spain*

<sup>2</sup>*Department of Chemistry, Atomic & Mass Spectrometry – A&MS research unit, Ghent University, Campus Sterre, Krijgslaan 281 - S12, 9000 Ghent, Belgium*

<sup>3</sup>*University of Zaragoza, Aragón Institute of Engineering Research (I3A), Department of Analytical Chemistry, Zaragoza, Spain*

\*Author for correspondence: [Frank.Vanhaecke@UGent.be](mailto:Frank.Vanhaecke@UGent.be)

**Number of pages: 9**

**Number of Tables: 7**

**Table S1.** Average  $\delta^{202}\text{Hg}$  values (‰) for the IH standard (n=5) and two standard deviations obtained at different concentration levels, several cone configurations (Standard and Jet), plasma conditions (Wet and dry) and amplifier setups ((i)  $10^{11} \Omega$  for each Faraday cup, (ii)  $10^{11} \Omega$  for Faraday cups L2 ( $^{199}\text{Hg}$ ), L1 ( $^{200}\text{Hg}$ ), H1 ( $^{202}\text{Hg}$ ) and  $10^{13} \Omega$  for Faraday cups L3 ( $^{198}\text{Hg}$ ) and C ( $^{201}\text{Hg}$ ), and (iii)  $10^{11} \Omega$  for Faraday cup L1 ( $^{200}\text{Hg}$ ) and  $10^{13} \Omega$  for Faraday cups L3 ( $^{198}\text{Hg}$ ), L2 ( $^{199}\text{Hg}$ ), C ( $^{201}\text{Hg}$ ) and H1 ( $^{202}\text{Hg}$ )).

| Cones                                    | Plasma | Amplifiers | $\delta^{202}\text{Hg}$ (‰) $\pm$ 2SD |                          |                        |                          |                           |                          |                           |  |
|------------------------------------------|--------|------------|---------------------------------------|--------------------------|------------------------|--------------------------|---------------------------|--------------------------|---------------------------|--|
|                                          |        |            | $5 \mu\text{g L}^{-1}$                | $2.5 \mu\text{g L}^{-1}$ | $1 \mu\text{g L}^{-1}$ | $0.5 \mu\text{g L}^{-1}$ | $0.25 \mu\text{g L}^{-1}$ | $0.1 \mu\text{g L}^{-1}$ | $0.05 \mu\text{g L}^{-1}$ |  |
| <b>IH (Literature value)<sup>6</sup></b> |        |            | <b><math>-0.59 \pm 0.15</math></b>    |                          |                        |                          |                           |                          |                           |  |
| Standard                                 | Wet    | (i)        | $-0.56 \pm 0.06$                      | $-0.49 \pm 0.22$         | $-0.48 \pm 0.30$       | $0.00 \pm 0.68$          |                           |                          |                           |  |
| Standard                                 | Wet    | (ii)       | $-0.49 \pm 0.26$                      | $-0.67 \pm 0.10$         | $-0.54 \pm 0.28$       | $-0.46 \pm 0.08$         | $-0.51 \pm 1.05$          |                          |                           |  |
| Jet                                      | Wet    | (i)        | $-0.51 \pm 0.08$                      | $-0.61 \pm 0.22$         | $-0.53 \pm 0.26$       | $-0.32 \pm 0.74$         | $-0.37 \pm 0.69$          |                          |                           |  |
| Jet                                      | Wet    | (ii)       |                                       | $-0.63 \pm 0.12$         | $-0.65 \pm 0.23$       | $-0.43 \pm 0.38$         |                           |                          |                           |  |
| Jet                                      | Dry    | (i)        | $-0.59 \pm 0.06$                      | $-0.56 \pm 0.06$         | $-0.50 \pm 0.15$       | $-0.46 \pm 0.36$         | $-0.17 \pm 0.82$          |                          |                           |  |
| Jet                                      | Dry    | (ii)       |                                       |                          | $-0.61 \pm 0.10$       | $-0.42 \pm 0.35$         | $-0.45 \pm 0.43$          | $-0.25 \pm 0.63$         |                           |  |
| Jet                                      | Wet    | (iii)      |                                       |                          | $-0.56 \pm 0.10$       | $-0.54 \pm 0.18$         | $-0.33 \pm 0.27$          | $-0.44 \pm 0.45$         |                           |  |
| Jet                                      | Dry    | (iii)      |                                       |                          | $-0.58 \pm 0.23$       | $-0.53 \pm 0.10$         | $-0.48 \pm 0.28$          | $-0.63 \pm 0.42$         | $-0.41 \pm 0.54$          |  |

**Table S2.** Average  $\delta^{201}\text{Hg}$  values (‰) for the IH standard (n=5) and two standard deviations obtained at different concentration levels, several cone configurations (Standard and Jet), plasma conditions (Wet and dry) and amplifier setups ((i)  $10^{11} \Omega$  for each Faraday cup, (ii)  $10^{11} \Omega$  for Faraday cups L2 ( $^{199}\text{Hg}$ ), L1 ( $^{200}\text{Hg}$ ), H1 ( $^{202}\text{Hg}$ ) and  $10^{13} \Omega$  for Faraday cups L3 ( $^{198}\text{Hg}$ ) and C ( $^{201}\text{Hg}$ ), and (iii)  $10^{11} \Omega$  for Faraday cup L1 ( $^{200}\text{Hg}$ ) and  $10^{13} \Omega$  for Faraday cups L3 ( $^{198}\text{Hg}$ ), L2 ( $^{199}\text{Hg}$ ), C ( $^{201}\text{Hg}$ ) and H1 ( $^{202}\text{Hg}$ )).

| Cones                                    | Plasma | Amplifiers | $\delta^{201}\text{Hg}$ (‰) $\pm$ 2SD |                          |                        |                          |                           |                          |                           |  |
|------------------------------------------|--------|------------|---------------------------------------|--------------------------|------------------------|--------------------------|---------------------------|--------------------------|---------------------------|--|
|                                          |        |            | $5 \mu\text{g L}^{-1}$                | $2.5 \mu\text{g L}^{-1}$ | $1 \mu\text{g L}^{-1}$ | $0.5 \mu\text{g L}^{-1}$ | $0.25 \mu\text{g L}^{-1}$ | $0.1 \mu\text{g L}^{-1}$ | $0.05 \mu\text{g L}^{-1}$ |  |
| <b>IH (Literature value)<sup>6</sup></b> |        |            | <b>-0.45 <math>\pm</math> 0.12</b>    |                          |                        |                          |                           |                          |                           |  |
| Standard                                 | Wet    | (i)        | -0.45 $\pm$ 0.12                      | -0.28 $\pm$ 0.28         | -0.45 $\pm$ 0.64       | -0.09 $\pm$ 0.99         |                           |                          |                           |  |
| Standard                                 | Wet    | (ii)       | -0.41 $\pm$ 0.11                      | -0.44 $\pm$ 0.12         | -0.51 $\pm$ 0.21       | -0.32 $\pm$ 0.29         | 0.44 $\pm$ 0.46           |                          |                           |  |
| Jet                                      | Wet    | (i)        | -0.39 $\pm$ 0.08                      | -0.48 $\pm$ 0.12         | -0.36 $\pm$ 0.29       | -0.30 $\pm$ 0.81         | 0.10 $\pm$ 1.02           |                          |                           |  |
| Jet                                      | Wet    | (ii)       |                                       | -0.48 $\pm$ 0.13         | -0.52 $\pm$ 0.14       | -0.40 $\pm$ 0.15         |                           |                          |                           |  |
| Jet                                      | Dry    | (i)        | -0.48 $\pm$ 0.07                      | -0.41 $\pm$ 0.09         | -0.36 $\pm$ 0.12       | -0.28 $\pm$ 0.33         | -0.24 $\pm$ 1.07          |                          |                           |  |
| Jet                                      | Dry    | (ii)       |                                       |                          | -0.43 $\pm$ 0.08       | -0.39 $\pm$ 0.06         | -0.39 $\pm$ 0.22          | -0.37 $\pm$ 0.78         |                           |  |
| Jet                                      | Wet    | (iii)      |                                       |                          | -0.40 $\pm$ 0.09       | -0.44 $\pm$ 0.23         | -0.38 $\pm$ 0.19          | -0.25 $\pm$ 0.26         |                           |  |
| Jet                                      | Dry    | (iii)      |                                       |                          | -0.45 $\pm$ 0.18       | -0.43 $\pm$ 0.08         | -0.37 $\pm$ 0.17          | -0.39 $\pm$ 0.54         | -0.29 $\pm$ 0.51          |  |

**Table S3.** Average  $\delta^{200}\text{Hg}$  values (‰) for the IH standard (n=5) and two standard deviations obtained at different concentration levels, several cone configurations (Standard and Jet), plasma conditions (Wet and dry) and amplifier setups ((i)  $10^{11} \Omega$  for each Faraday cup, (ii)  $10^{11} \Omega$  for Faraday cups L2 ( $^{199}\text{Hg}$ ), L1 ( $^{200}\text{Hg}$ ), H1 ( $^{202}\text{Hg}$ ) and  $10^{13} \Omega$  for Faraday cups L3 ( $^{198}\text{Hg}$ ) and C ( $^{201}\text{Hg}$ ), and (iii)  $10^{11} \Omega$  for Faraday cup L1 ( $^{200}\text{Hg}$ ) and  $10^{13} \Omega$  for Faraday cups L3 ( $^{198}\text{Hg}$ ), L2 ( $^{199}\text{Hg}$ ), C ( $^{201}\text{Hg}$ ) and H1 ( $^{202}\text{Hg}$ )).

| Cones                                    | Plasma | Amplifiers | $\delta^{200}\text{Hg} (\text{‰}) \pm 2\text{SD}$ |                          |                        |                          |                           |                          |                           |  |
|------------------------------------------|--------|------------|---------------------------------------------------|--------------------------|------------------------|--------------------------|---------------------------|--------------------------|---------------------------|--|
|                                          |        |            | $5 \mu\text{g L}^{-1}$                            | $2.5 \mu\text{g L}^{-1}$ | $1 \mu\text{g L}^{-1}$ | $0.5 \mu\text{g L}^{-1}$ | $0.25 \mu\text{g L}^{-1}$ | $0.1 \mu\text{g L}^{-1}$ | $0.05 \mu\text{g L}^{-1}$ |  |
| <b>IH (Literature value)<sup>6</sup></b> |        |            | <b>- 0.30 ± 0.12</b>                              |                          |                        |                          |                           |                          |                           |  |
| Standard                                 | Wet    | (i)        | -0.29 ± 0.08                                      | -0.22 ± 0.24             | -0.16 ± 0.38           | 0.10 ± 0.78              |                           |                          |                           |  |
| Standard                                 | Wet    | (ii)       | -0.21 ± 0.19                                      | -0.32 ± 0.17             | -0.38 ± 0.27           | -0.20 ± 0.34             | -0.05 ± 0.36              |                          |                           |  |
| Jet                                      | Wet    | (i)        | -0.25 ± 0.03                                      | -0.29 ± 0.11             | -0.21 ± 0.39           | -0.04 ± 0.50             | 0.23 ± 0.92               |                          |                           |  |
| Jet                                      | Wet    | (ii)       |                                                   | -0.33 ± 0.10             | -0.41 ± 0.21           | -0.13 ± 0.26             |                           |                          |                           |  |
| Jet                                      | Dry    | (i)        | -0.30 ± 0.08                                      | -0.28 ± 0.07             | -0.23 ± 0.11           | -0.30 ± 0.47             | -0.03 ± 1.03              |                          |                           |  |
| Jet                                      | Dry    | (ii)       |                                                   |                          | -0.30 ± 0.14           | -0.20 ± 0.43             | -0.19 ± 0.24              | -0.25 ± 0.60             |                           |  |
| Jet                                      | Wet    | (iii)      |                                                   |                          | -0.32 ± 0.17           | -0.21 ± 0.28             | -0.19 ± 0.36              | -0.15 ± 0.64             |                           |  |
| Jet                                      | Dry    | (iii)      |                                                   |                          | -0.29 ± 0.35           | -0.25 ± 0.16             | -0.31 ± 0.24              | -0.05 ± 0.52             | -0.10 ± 0.30              |  |

**Table S4.** Average  $\delta^{199}\text{Hg}$  (‰) values for the IH standard (n=5) and two standard deviations obtained at different concentration levels, several cone configurations (Standard and Jet), plasma conditions (Wet and dry) and amplifier setups ((i)  $10^{11} \Omega$  for each Faraday cup, (ii)  $10^{11} \Omega$  for Faraday cups L2 ( $^{199}\text{Hg}$ ), L1 ( $^{200}\text{Hg}$ ), H1 ( $^{202}\text{Hg}$ ) and  $10^{13} \Omega$  for Faraday cups L3 ( $^{198}\text{Hg}$ ) and C ( $^{201}\text{Hg}$ ), and (iii)  $10^{11} \Omega$  for Faraday cup L1 ( $^{200}\text{Hg}$ ) and  $10^{13} \Omega$  for Faraday cups L3 ( $^{198}\text{Hg}$ ), L2 ( $^{199}\text{Hg}$ ), C ( $^{201}\text{Hg}$ ) and H1 ( $^{202}\text{Hg}$ )).

| Cones                                    | Plasma | Amplifiers | $\delta^{199}\text{Hg}$ (‰) $\pm$ 2SD |                          |                        |                          |                           |                          |                           |  |
|------------------------------------------|--------|------------|---------------------------------------|--------------------------|------------------------|--------------------------|---------------------------|--------------------------|---------------------------|--|
|                                          |        |            | 5 $\mu\text{g L}^{-1}$                | 2.5 $\mu\text{g L}^{-1}$ | 1 $\mu\text{g L}^{-1}$ | 0.5 $\mu\text{g L}^{-1}$ | 0.25 $\mu\text{g L}^{-1}$ | 0.1 $\mu\text{g L}^{-1}$ | 0.05 $\mu\text{g L}^{-1}$ |  |
| <b>IH (Literature value)<sup>6</sup></b> |        |            | <b>-0.14 <math>\pm</math> 0.09</b>    |                          |                        |                          |                           |                          |                           |  |
| Standard                                 | Wet    | (i)        | -0.08 $\pm$ 0.09                      | -0.07 $\pm$ 0.17         | 0.04 $\pm$ 0.72        | -0.15 $\pm$ 0.88         |                           |                          |                           |  |
| Standard                                 | Wet    | (ii)       | -0.02 $\pm$ 0.27                      | -0.19 $\pm$ 0.18         | -0.09 $\pm$ 0.40       | 0.00 $\pm$ 0.51          | 0.48 $\pm$ 0.66           |                          |                           |  |
| Jet                                      | Wet    | (i)        | -0.09 $\pm$ 0.07                      | -0.17 $\pm$ 0.21         | -0.05 $\pm$ 0.50       | 0.12 $\pm$ 0.77          | 0.29 $\pm$ 0.70           |                          |                           |  |
| Jet                                      | Wet    | (ii)       |                                       | -0.12 $\pm$ 0.14         | -0.23 $\pm$ 0.18       | -0.15 $\pm$ 0.25         |                           |                          |                           |  |
| Jet                                      | Dry    | (i)        | -0.17 $\pm$ 0.02                      | -0.11 $\pm$ 0.06         | -0.06 $\pm$ 0.14       | -0.07 $\pm$ 0.51         | -0.19 $\pm$ 0.73          |                          |                           |  |
| Jet                                      | Dry    | (ii)       |                                       |                          | -0.09 $\pm$ 0.15       | -0.06 $\pm$ 0.13         | -0.33 $\pm$ 0.68          | 0.30 $\pm$ 1.33          |                           |  |
| Jet                                      | Wet    | (iii)      |                                       |                          | -0.12 $\pm$ 0.11       | -0.15 $\pm$ 0.09         | -0.22 $\pm$ 0.20          | -0.10 $\pm$ 0.65         |                           |  |
| Jet                                      | Dry    | (iii)      |                                       |                          | -0.15 $\pm$ 0.14       | -0.12 $\pm$ 0.08         | -0.09 $\pm$ 0.35          | -0.15 $\pm$ 0.39         | -0.09 $\pm$ 0.63          |  |

**Table S5.** Average  $\delta^{XX}\text{Hg}$  values (‰) for the IH standard (n=5) and standard deviation obtained with standard and Jet cones under wet plasma conditions and with  $10^{11} \Omega$  amplifiers at different concentration levels.

| Standard cones, wet plasma, $10^{11} \Omega$ amplifiers | $\delta^{199}\text{Hg} \pm \text{SD}$ | $\delta^{200}\text{Hg} \pm \text{SD}$ | $\delta^{201}\text{Hg} \pm \text{SD}$ | $\delta^{202}\text{Hg} \pm \text{SD}$ |
|---------------------------------------------------------|---------------------------------------|---------------------------------------|---------------------------------------|---------------------------------------|
| 5 $\mu\text{g L}^{-1}$ Without blank subtraction        | $-0.08 \pm 0.05$                      | $-0.29 \pm 0.04$                      | $-0.45 \pm 0.06$                      | $-0.56 \pm 0.03$                      |
| 5 $\mu\text{g L}^{-1}$ With blank subtraction           | $-0.10 \pm 0.08$                      | $-0.30 \pm 0.07$                      | $-0.47 \pm 0.10$                      | $-0.58 \pm 0.05$                      |
| 2.5 $\mu\text{g L}^{-1}$ Without blank subtraction      | $-0.07 \pm 0.09$                      | $-0.22 \pm 0.12$                      | $-0.28 \pm 0.14$                      | $-0.49 \pm 0.11$                      |
| 2.5 $\mu\text{g L}^{-1}$ With blank subtraction         | $0.01 \pm 0.05$                       | $-0.21 \pm 0.08$                      | $-0.22 \pm 0.09$                      | $-0.44 \pm 0.10$                      |
| 1 $\mu\text{g L}^{-1}$ Without blank subtraction        | $0.04 \pm 0.36$                       | $-0.16 \pm 0.19$                      | $-0.45 \pm 0.32$                      | $-0.48 \pm 0.15$                      |
| 1 $\mu\text{g L}^{-1}$ With blank subtraction           | $-0.01 \pm 0.30$                      | $-0.10 \pm 0.20$                      | $-0.46 \pm 0.28$                      | $-0.45 \pm 0.09$                      |
| 0.5 $\mu\text{g L}^{-1}$ Without blank subtraction      | $-0.15 \pm 0.44$                      | $0.10 \pm 0.39$                       | $-0.09 \pm 0.50$                      | $0.00 \pm 0.34$                       |
| 0.5 $\mu\text{g L}^{-1}$ With blank subtraction         | $-0.01 \pm 0.73$                      | $0.52 \pm 0.25$                       | $-0.11 \pm 0.30$                      | $0.22 \pm 0.17$                       |
| Jet cones, wet plasma, $10^{11} \Omega$ amplifiers      |                                       |                                       |                                       |                                       |
| 5 $\mu\text{g L}^{-1}$ Without blank subtraction        | $-0.09 \pm 0.04$                      | $-0.25 \pm 0.02$                      | $-0.39 \pm 0.04$                      | $-0.51 \pm 0.04$                      |
| 5 $\mu\text{g L}^{-1}$ With blank subtraction           | $-0.10 \pm 0.06$                      | $-0.25 \pm 0.05$                      | $-0.41 \pm 0.09$                      | $-0.55 \pm 0.09$                      |
| 2.5 $\mu\text{g L}^{-1}$ Without blank subtraction      | $-0.17 \pm 0.11$                      | $-0.29 \pm 0.06$                      | $-0.48 \pm 0.06$                      | $-0.61 \pm 0.11$                      |
| 2.5 $\mu\text{g L}^{-1}$ With blank subtraction         | $-0.18 \pm 0.16$                      | $-0.31 \pm 0.10$                      | $-0.54 \pm 0.06$                      | $-0.66 \pm 0.11$                      |
| 1 $\mu\text{g L}^{-1}$ Without blank subtraction        | $-0.05 \pm 0.25$                      | $-0.21 \pm 0.20$                      | $-0.36 \pm 0.14$                      | $-0.53 \pm 0.13$                      |
| 1 $\mu\text{g L}^{-1}$ With blank subtraction           | $0.07 \pm 0.21$                       | $-0.09 \pm 0.18$                      | $-0.28 \pm 0.22$                      | $-0.45 \pm 0.18$                      |
| 0.5 $\mu\text{g L}^{-1}$ Without blank subtraction      | $0.12 \pm 0.38$                       | $-0.04 \pm 0.25$                      | $-0.30 \pm 0.40$                      | $-0.32 \pm 0.37$                      |
| 0.5 $\mu\text{g L}^{-1}$ With blank subtraction         | $0.27 \pm 0.71$                       | $-0.04 \pm 0.56$                      | $-0.45 \pm 0.60$                      | $-0.26 \pm 0.69$                      |

**Table S6.** Average RSD values (%) and SD for the Hg isotope ratios of six measurements performed at decreasing concentration levels of a NIST SRM 3133 solution under several configurations: two cone configurations (Standard and Jet), two plasma conditions (Wet and dry) and three amplifier setups ((i)  $10^{11} \Omega$  for each Faraday cup, (ii)  $10^{11} \Omega$  for Faraday cups L2 ( $^{199}\text{Hg}$ ), L1 ( $^{200}\text{Hg}$ ), H1 ( $^{202}\text{Hg}$ ) and  $10^{13} \Omega$  for Faraday cups L3 ( $^{198}\text{Hg}$ ) and C ( $^{201}\text{Hg}$ ), and (iii)  $10^{11} \Omega$  for Faraday cup L1 ( $^{200}\text{Hg}$ ) and  $10^{13} \Omega$  in Faraday cups for L3 ( $^{198}\text{Hg}$ ), L2 ( $^{199}\text{Hg}$ ), C ( $^{201}\text{Hg}$ ) and H1 ( $^{202}\text{Hg}$ )).

| Cones    | Plasma | Amplifiers | 5 $\mu\text{g L}^{-1}$            |        | 2.5 $\mu\text{g L}^{-1}$ |        | 1 $\mu\text{g L}^{-1}$ |        | 0.5 $\mu\text{g L}^{-1}$ |        | 0.25 $\mu\text{g L}^{-1}$ |        | 0.1 $\mu\text{g L}^{-1}$ |        | 0.05 $\mu\text{g L}^{-1}$ |        |        |        |        |        |        |        |        |        |        |        |        |        |
|----------|--------|------------|-----------------------------------|--------|--------------------------|--------|------------------------|--------|--------------------------|--------|---------------------------|--------|--------------------------|--------|---------------------------|--------|--------|--------|--------|--------|--------|--------|--------|--------|--------|--------|--------|--------|
|          |        |            | Average                           | SD     | Average                  | SD     | Average                | SD     | Average                  | SD     | Average                   | SD     | Average                  | SD     | Average                   | SD     |        |        |        |        |        |        |        |        |        |        |        |        |
| Standard | Wet    | (i)        | $^{199}\text{Hg}/^{198}\text{Hg}$ | 0.0026 | 0.0003                   | 0.0037 | 0.0005                 | 0.0077 | 0.0002                   | 0.0248 | 0.0317                    |        |                          |        |                           |        |        |        |        |        |        |        |        |        |        |        |        |        |
|          |        |            | $^{200}\text{Hg}/^{198}\text{Hg}$ | 0.0026 | 0.0004                   | 0.0040 | 0.0003                 | 0.0080 | 0.0005                   | 0.0196 | 0.0204                    |        |                          |        |                           |        |        |        |        |        |        |        |        |        |        |        |        |        |
|          |        |            | $^{201}\text{Hg}/^{198}\text{Hg}$ | 0.0027 | 0.0002                   | 0.0044 | 0.0006                 | 0.0082 | 0.0004                   | 0.0217 | 0.0216                    |        |                          |        |                           |        |        |        |        |        |        |        |        |        |        |        |        |        |
|          |        |            | $^{202}\text{Hg}/^{198}\text{Hg}$ | 0.0026 | 0.0003                   | 0.0037 | 0.0004                 | 0.0074 | 0.0005                   | 0.0195 | 0.0208                    |        |                          |        |                           |        |        |        |        |        |        |        |        |        |        |        |        |        |
| Standard | Wet    | (ii)       | $^{199}\text{Hg}/^{198}\text{Hg}$ | 0.0096 | 0.0017                   | 0.0095 | 0.0020                 | 0.0108 | 0.0020                   | 0.0124 | 0.0007                    | 0.0215 | 0.0010                   |        |                           |        |        |        |        |        |        |        |        |        |        |        |        |        |
|          |        |            | $^{200}\text{Hg}/^{198}\text{Hg}$ | 0.0094 | 0.0019                   | 0.0091 | 0.0016                 | 0.0100 | 0.0012                   | 0.0124 | 0.0007                    | 0.0179 | 0.0024                   |        |                           |        |        |        |        |        |        |        |        |        |        |        |        |        |
|          |        |            | $^{201}\text{Hg}/^{198}\text{Hg}$ | 0.0024 | 0.0003                   | 0.0031 | 0.0005                 | 0.0052 | 0.0006                   | 0.0075 | 0.0006                    | 0.0132 | 0.0016                   |        |                           |        |        |        |        |        |        |        |        |        |        |        |        |        |
|          |        |            | $^{202}\text{Hg}/^{198}\text{Hg}$ | 0.0093 | 0.0020                   | 0.0091 | 0.0020                 | 0.0094 | 0.0016                   | 0.0111 | 0.0009                    | 0.0182 | 0.0040                   |        |                           |        |        |        |        |        |        |        |        |        |        |        |        |        |
| Jet      | Wet    | (i)        | $^{199}\text{Hg}/^{198}\text{Hg}$ | 0.0020 | 0.0002                   | 0.0029 | 0.0003                 | 0.0055 | 0.0004                   | 0.0089 | 0.0007                    |        |                          |        |                           |        |        |        |        |        |        |        |        |        |        |        |        |        |
|          |        |            | $^{200}\text{Hg}/^{198}\text{Hg}$ | 0.0018 | 0.0002                   | 0.0027 | 0.0003                 | 0.0050 | 0.0003                   | 0.0079 | 0.0005                    |        |                          |        |                           |        |        |        |        |        |        |        |        |        |        |        |        |        |
|          |        |            | $^{201}\text{Hg}/^{198}\text{Hg}$ | 0.0022 | 0.0002                   | 0.0030 | 0.0002                 | 0.0055 | 0.0006                   | 0.0097 | 0.0008                    |        |                          |        |                           |        |        |        |        |        |        |        |        |        |        |        |        |        |
|          |        |            | $^{202}\text{Hg}/^{198}\text{Hg}$ | 0.0018 | 0.0001                   | 0.0027 | 0.0003                 | 0.0048 | 0.0004                   | 0.0082 | 0.0007                    |        |                          |        |                           |        |        |        |        |        |        |        |        |        |        |        |        |        |
| Jet      | Wet    | (ii)       | $^{199}\text{Hg}/^{198}\text{Hg}$ |        |                          | 0.0061 | 0.0011                 | 0.0075 | 0.0006                   | 0.0101 | 0.0008                    |        |                          |        |                           |        |        |        |        |        |        |        |        |        |        |        |        |        |
|          |        |            | $^{200}\text{Hg}/^{198}\text{Hg}$ |        |                          | 0.0064 | 0.0013                 | 0.0068 | 0.0007                   | 0.0094 | 0.0016                    |        |                          |        |                           |        |        |        |        |        |        |        |        |        |        |        |        |        |
|          |        |            | $^{201}\text{Hg}/^{198}\text{Hg}$ |        |                          | 0.0027 | 0.0004                 | 0.0041 | 0.0004                   | 0.0060 | 0.0005                    |        |                          |        |                           |        |        |        |        |        |        |        |        |        |        |        |        |        |
|          |        |            | $^{202}\text{Hg}/^{198}\text{Hg}$ |        |                          | 0.0063 | 0.0014                 | 0.0071 | 0.0007                   | 0.0094 | 0.0013                    |        |                          |        |                           |        |        |        |        |        |        |        |        |        |        |        |        |        |
| Jet      | Dry    | (i)        | $^{199}\text{Hg}/^{198}\text{Hg}$ | 0.0028 | 0.0031                   | 0.0024 | 0.0003                 | 0.0043 | 0.0002                   | 0.0069 | 0.0009                    | 0.0123 | 0.0014                   |        |                           |        |        |        |        |        |        |        |        |        |        |        |        |        |
|          |        |            | $^{200}\text{Hg}/^{198}\text{Hg}$ | 0.0028 | 0.0032                   | 0.0022 | 0.0002                 | 0.0042 | 0.0005                   | 0.0065 | 0.0008                    | 0.0121 | 0.0022                   |        |                           |        |        |        |        |        |        |        |        |        |        |        |        |        |
|          |        |            | $^{201}\text{Hg}/^{198}\text{Hg}$ | 0.0017 | 0.0004                   | 0.0024 | 0.0003                 | 0.0046 | 0.0003                   | 0.0074 | 0.0009                    | 0.0133 | 0.0016                   |        |                           |        |        |        |        |        |        |        |        |        |        |        |        |        |
|          |        |            | $^{202}\text{Hg}/^{198}\text{Hg}$ | 0.0028 | 0.0034                   | 0.0022 | 0.0004                 | 0.0041 | 0.0005                   | 0.0059 | 0.0006                    | 0.0119 | 0.0020                   |        |                           |        |        |        |        |        |        |        |        |        |        |        |        |        |
| Jet      | Dry    | (ii)       | $^{199}\text{Hg}/^{198}\text{Hg}$ |        |                          |        |                        | 0.0064 | 0.0015                   | 0.0076 | 0.0017                    | 0.0090 | 0.0007                   | 0.0128 | 0.0024                    | 0.0207 | 0.0030 |        |        |        |        |        |        |        |        |        |        |        |
|          |        |            | $^{200}\text{Hg}/^{198}\text{Hg}$ |        |                          |        |                        |        |                          | 0.0060 | 0.0011                    | 0.0076 | 0.0016                   | 0.0084 | 0.0013                    | 0.0127 | 0.0030 | 0.0197 | 0.0029 |        |        |        |        |        |        |        |        |        |
|          |        |            | $^{201}\text{Hg}/^{198}\text{Hg}$ |        |                          |        |                        |        |                          |        |                           | 0.0028 | 0.0003                   | 0.0034 | 0.0002                    | 0.0046 | 0.0005 | 0.0068 | 0.0007 | 0.0135 | 0.0009 |        |        |        |        |        |        |        |
|          |        |            | $^{202}\text{Hg}/^{198}\text{Hg}$ |        |                          |        |                        |        |                          |        |                           | 0.0078 | 0.0016                   | 0.0085 | 0.0011                    | 0.0115 | 0.0022 | 0.0178 | 0.0019 | 0.0178 | 0.0019 |        |        |        |        |        |        |        |
| Jet      | Wet    | (iii)      | $^{199}\text{Hg}/^{198}\text{Hg}$ |        |                          |        |                        |        |                          | 0.0040 | 0.0005                    | 0.0051 | 0.0005                   | 0.0095 | 0.0011                    | 0.0172 | 0.0013 |        |        |        |        |        |        |        |        |        |        |        |
|          |        |            | $^{200}\text{Hg}/^{198}\text{Hg}$ |        |                          |        |                        |        |                          |        |                           | 0.0115 | 0.0015                   | 0.0120 | 0.0013                    | 0.0221 | 0.0016 | 0.0266 | 0.0029 |        |        |        |        |        |        |        |        |        |
|          |        |            | $^{201}\text{Hg}/^{198}\text{Hg}$ |        |                          |        |                        |        |                          |        |                           |        | 0.0044                   | 0.0010 | 0.0059                    | 0.0008 | 0.0108 | 0.0012 | 0.0173 | 0.0012 |        |        |        |        |        |        |        |        |
|          |        |            | $^{202}\text{Hg}/^{198}\text{Hg}$ |        |                          |        |                        |        |                          |        |                           |        | 0.0044                   | 0.0003 | 0.0054                    | 0.0006 | 0.0101 | 0.0012 | 0.0161 | 0.0022 |        |        |        |        |        |        |        |        |
| Jet      | Dry    | (iii)      | $^{199}\text{Hg}/^{198}\text{Hg}$ |        |                          |        |                        |        |                          |        |                           |        |                          |        |                           |        | 0.0156 | 0.0014 |        |        |        |        |        |        |        |        |        |        |
|          |        |            | $^{200}\text{Hg}/^{198}\text{Hg}$ |        |                          |        |                        |        |                          |        |                           |        |                          |        |                           |        |        | 0.0132 | 0.0037 | 0.0104 | 0.0007 | 0.0124 | 0.0017 | 0.0179 | 0.0027 | 0.0250 | 0.0041 |        |
|          |        |            | $^{201}\text{Hg}/^{198}\text{Hg}$ |        |                          |        |                        |        |                          |        |                           |        |                          |        |                           |        |        |        | 0.0042 | 0.0008 | 0.0049 | 0.0003 | 0.0065 | 0.0004 | 0.0109 | 0.0014 | 0.0161 | 0.0013 |
|          |        |            | $^{202}\text{Hg}/^{198}\text{Hg}$ |        |                          |        |                        |        |                          |        |                           |        |                          |        |                           |        |        |        |        | 0.0045 | 0.0007 | 0.0048 | 0.0006 | 0.0060 | 0.0007 | 0.0104 | 0.0018 | 0.0151 |

**Table S7.** Average  $\delta^{XXX}\text{Hg}$  values (‰) for the IH standard (n=5) with corresponding SD and average RSD(%) values for Hg isotope ratio results for NIST SRM 3133 (n=6) and SD obtained at various concentration levels, with and without tau correction.

|                                             |                    |                | $\delta^{199}\text{Hg}$ | $\delta^{200}\text{Hg}$ | $\delta^{201}\text{Hg}$ | $\delta^{202}\text{Hg}$ | $^{199}\text{Hg}/^{198}\text{Hg}$ | $^{200}\text{Hg}/^{198}\text{Hg}$ | $^{201}\text{Hg}/^{198}\text{Hg}$ | $^{202}\text{Hg}/^{198}\text{Hg}$ |
|---------------------------------------------|--------------------|----------------|-------------------------|-------------------------|-------------------------|-------------------------|-----------------------------------|-----------------------------------|-----------------------------------|-----------------------------------|
|                                             |                    |                |                         |                         |                         |                         | RSD (%)                           | RSD (%)                           | RSD (%)                           | RSD (%)                           |
| <b>1.00 <math>\mu\text{g L}^{-1}</math></b> | <b>with tau</b>    | <b>Average</b> | -0.130                  | -0.308                  | -0.423                  | -0.617                  | 0.007                             | 0.007                             | 0.003                             | 0.007                             |
|                                             | <b>correction</b>  | <b>SD</b>      | 0.105                   | 0.056                   | 0.036                   | 0.041                   | 0.001                             | 0.002                             | 0.000                             | 0.001                             |
|                                             | <b>without tau</b> | <b>Average</b> | -0.095                  | -0.296                  | -0.426                  | -0.606                  | 0.008                             | 0.008                             | 0.003                             | 0.008                             |
|                                             | <b>correction</b>  | <b>SD</b>      | 0.073                   | 0.072                   | 0.041                   | 0.051                   | 0.002                             | 0.002                             | 0.000                             | 0.002                             |
| <b>0.50 <math>\mu\text{g L}^{-1}</math></b> | <b>with tau</b>    | <b>Average</b> | -0.129                  | -0.242                  | -0.383                  | -0.470                  | 0.009                             | 0.008                             | 0.005                             | 0.008                             |
|                                             | <b>correction</b>  | <b>SD</b>      | 0.046                   | 0.146                   | 0.038                   | 0.119                   | 0.001                             | 0.001                             | 0.001                             | 0.001                             |
|                                             | <b>without tau</b> | <b>Average</b> | -0.064                  | -0.197                  | -0.394                  | -0.418                  | 0.009                             | 0.008                             | 0.005                             | 0.008                             |
|                                             | <b>correction</b>  | <b>SD</b>      | 0.067                   | 0.217                   | 0.030                   | 0.177                   | 0.001                             | 0.001                             | 0.000                             | 0.001                             |
| <b>0.25 <math>\mu\text{g L}^{-1}</math></b> | <b>with tau</b>    | <b>Average</b> | -0.270                  | -0.151                  | -0.393                  | -0.441                  | 0.012                             | 0.012                             | 0.007                             | 0.011                             |
|                                             | <b>correction</b>  | <b>SD</b>      | 0.322                   | 0.182                   | 0.105                   | 0.194                   | 0.001                             | 0.002                             | 0.001                             | 0.001                             |
|                                             | <b>without tau</b> | <b>Average</b> | -0.330                  | -0.193                  | -0.394                  | -0.452                  | 0.013                             | 0.013                             | 0.007                             | 0.012                             |
|                                             | <b>correction</b>  | <b>SD</b>      | 0.342                   | 0.119                   | 0.110                   | 0.214                   | 0.002                             | 0.003                             | 0.001                             | 0.002                             |
| <b>0.10 <math>\mu\text{g L}^{-1}</math></b> | <b>with tau</b>    | <b>Average</b> | 0.323                   | -0.187                  | -0.359                  | -0.229                  | 0.021                             | 0.019                             | 0.014                             | 0.017                             |
|                                             | <b>correction</b>  | <b>SD</b>      | 0.627                   | 0.317                   | 0.392                   | 0.335                   | 0.003                             | 0.002                             | 0.001                             | 0.001                             |
|                                             | <b>without tau</b> | <b>Average</b> | 0.301                   | -0.247                  | -0.368                  | -0.254                  | 0.021                             | 0.020                             | 0.013                             | 0.018                             |
|                                             | <b>correction</b>  | <b>SD</b>      | 0.664                   | 0.302                   | 0.390                   | 0.313                   | 0.003                             | 0.003                             | 0.001                             | 0.002                             |
